# Supplementary material for: Nuclear translocation of FGFR1 and FGF2 in pancreatic stellate cells facilitates pancreatic cancer cell invasion
Source: PubMed Central journal article supplement (PMC3992074; doi:10.1002/emmm.201302698), 2014-02-06

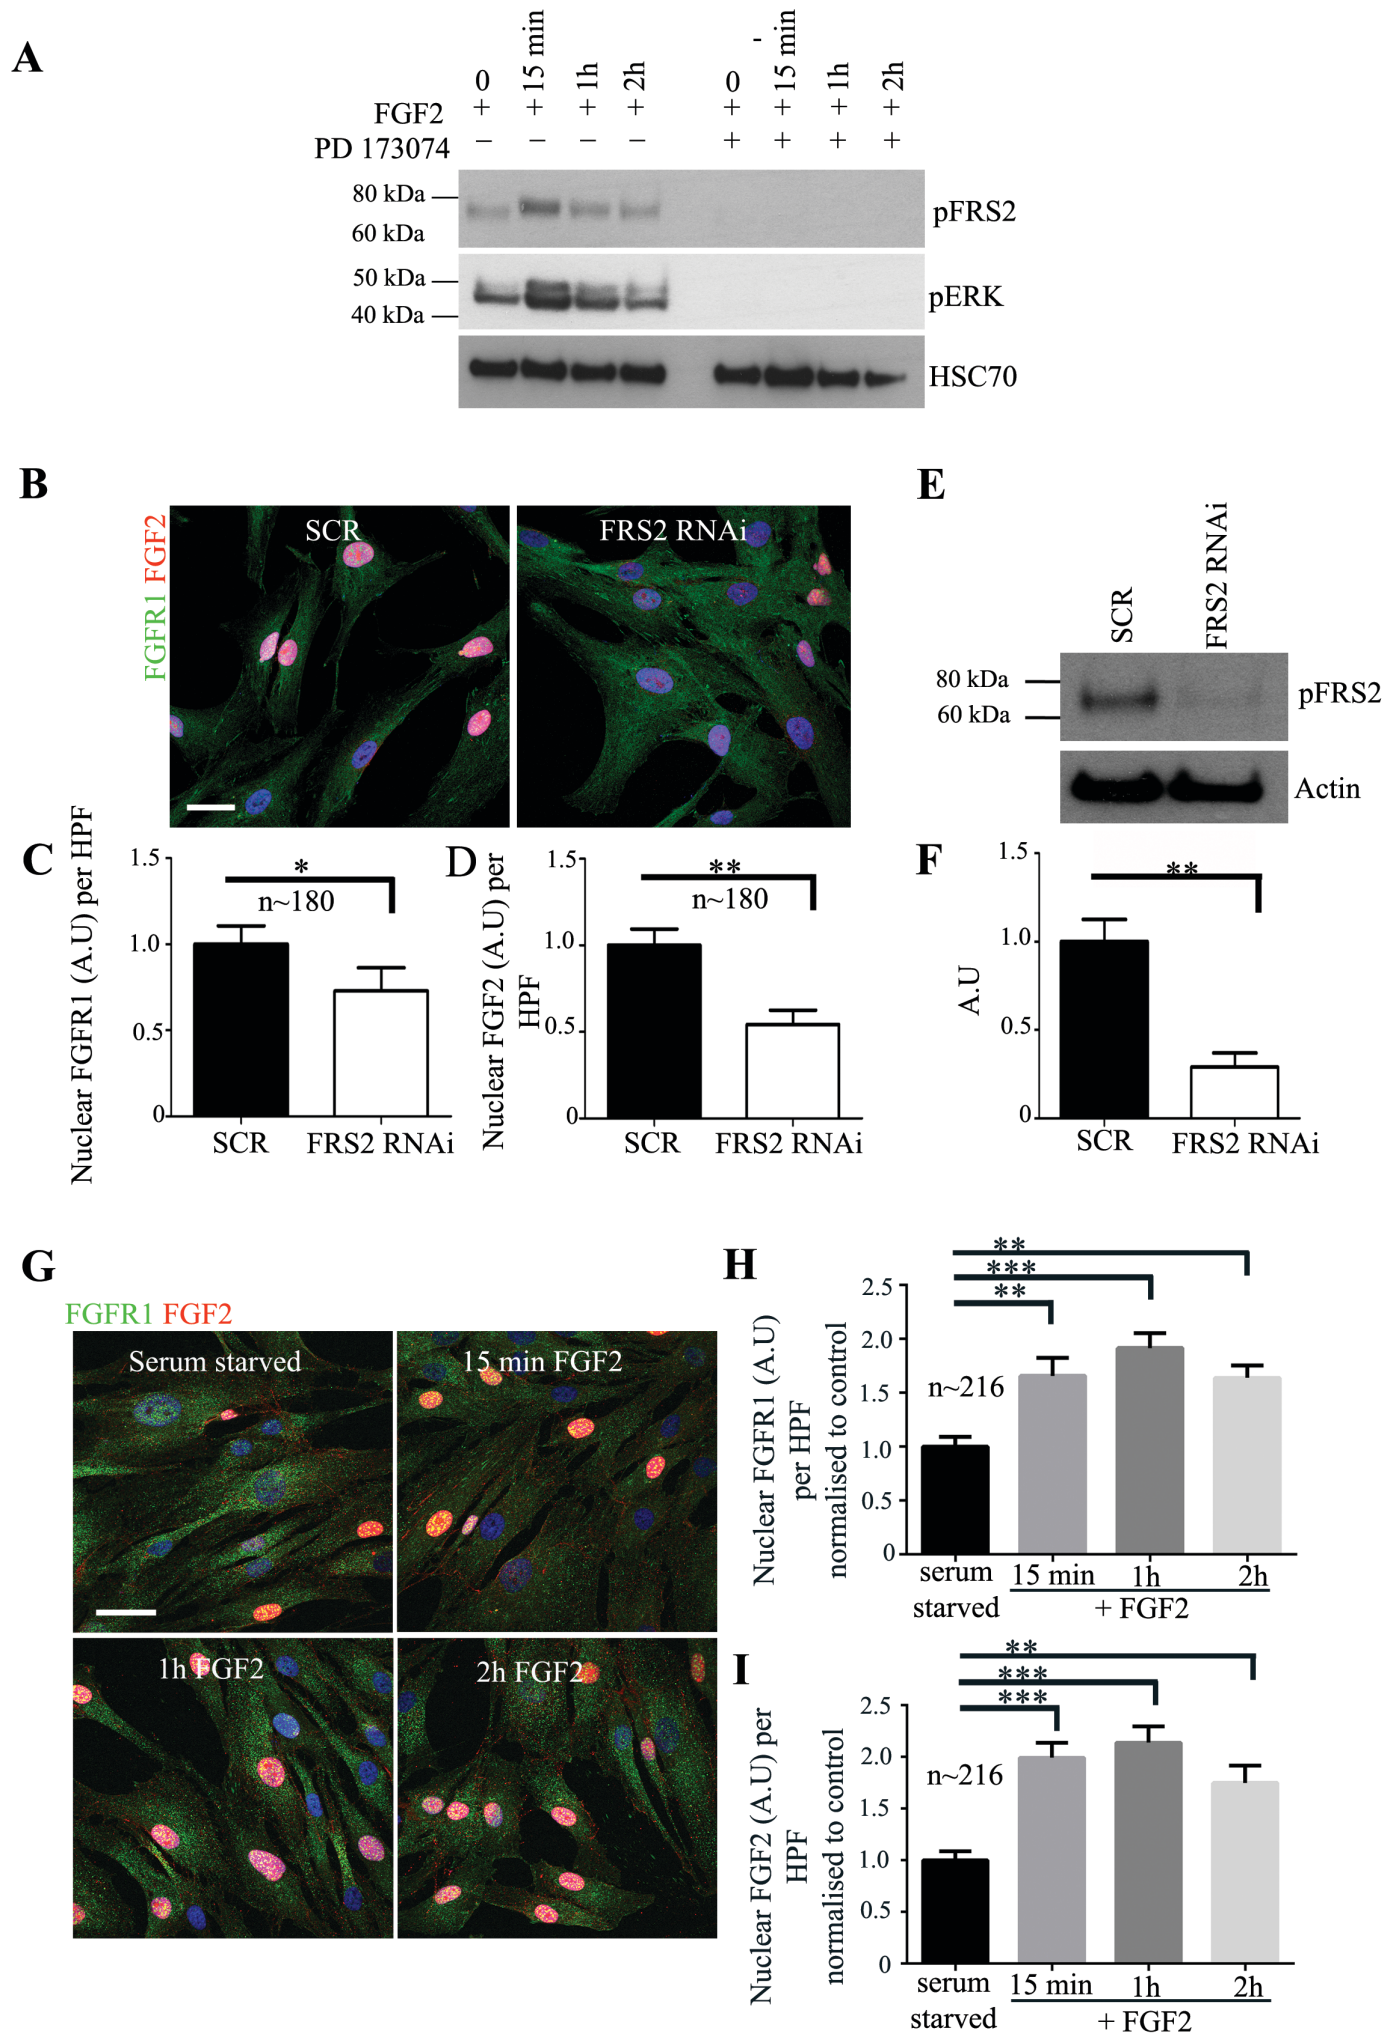

Supplement: emmm0006-0467-sd7.pdf [file emmm0006-0467-sd7.pdf]
