# Supplementary material for: Nuclear translocation of FGFR1 and FGF2 in pancreatic stellate cells facilitates pancreatic cancer cell invasion
Source: PubMed Central journal article supplement (PMC3992074; doi:10.1002/emmm.201302698), 2014-02-06
Supplement: emmm0006-0467-sd12.pdf [file emmm0006-0467-sd12.pdf]

## Supporting Information Table 1

### Cell numbers

| Experiment                               | Total cell numbers | Cancer cells       | Stellate cells (PS1 unless specified) |
|------------------------------------------|--------------------|--------------------|---------------------------------------|
| Cancer cells alone organotypic           |                    | $5 \times 10^5$    | 0                                     |
| Cancer: stellate cells organotypic       | $5 \times 10^5$    | $1.66 \times 10^5$ | $3.33 \times 10^5$                    |
| Cancer cells alone mini- organotypic     |                    | $1 \times 10^5$    | 0                                     |
| Cancer: stellate cells mini- organotypic | $1 \times 10^5$    | $0.33 \times 10^5$ | $0.66 \times 10^5$ (primary PSC)      |
| FGF stimulation assays                   |                    |                    | $1 \times 10^5$                       |
| Cell growth assays                       |                    |                    | $5 \times 10^4$                       |
| FACS (PI)                                |                    |                    | $2.5 \times 10^5$                     |
