# Supplementary material for: Nuclear translocation of FGFR1 and FGF2 in pancreatic stellate cells facilitates pancreatic cancer cell invasion
Source: PubMed Central journal article supplement (PMC3992074; doi:10.1002/emmm.201302698), 2014-02-06
Supplement: emmm0006-0467-sd13.pdf [file emmm0006-0467-sd13.pdf]

## Supporting Information Table 2

### Antibodies

All antibodies are summarised in Table 2

| Antibody                                                           | Species raised in | Supplier (Cat No)       | Dilution for IF or IHC  | Dilution for WB |
|--------------------------------------------------------------------|-------------------|-------------------------|-------------------------|-----------------|
| HSC70                                                              | Mouse             | Santa Cruz (SC7298)     | N.A.                    | 1:1000          |
| $\alpha$ SMA                                                       | Rabbit            | Abcam (ab5694)          | 1:100                   | NA              |
| $\alpha$ SMA                                                       | Mouse             | Dako clone 1A4 (M0851)  | 1:300                   | 1:100           |
| Vimentin                                                           | Mouse             | Dako clone V9 (M0725)   | c.s 1:2000<br>FFPE 1:50 | 1:250           |
| Ki67                                                               | Rabbit            | Abcam (ab15580)         | c.s 1:100<br>FFPE 1:100 | N.A             |
| FGFR1 (recognises intracellular epitope in C terminus)             | Rabbit            | Santa Cruz (SC121)      | N.A                     | 1:1000          |
| FGFR1 (recognises extracellular epitope near transmembrane domain) | Rabbit            | Abcam (10646)           | c.s 1:100<br>FFPE 1:500 | N.A             |
| Tubulin                                                            | Mouse             | Sigma (T5168)           | N.A                     | 1:2000          |
| Lamin A/C                                                          | Goat              | Santa Cruz (SC6215)     | N.A                     | 1.1000          |
| Actin                                                              | Goat              | Santa Cruz (SC1615)     |                         |                 |
| FGF2                                                               | Rabbit            | Peprtech (500-P18)      | N.A                     | 1:500           |
| FGF2                                                               | Mouse             | Millipore (05-118)      | c.s 1:100<br>FFPE 1:100 | N.A             |
| pFRS2                                                              | Rabbit            | Cell Signalling (38645) | N.A                     | 1:1000          |
| pERK                                                               | Rabbit            | Cell Signalling (91015) | N.A                     | 1:1000          |
| SC35                                                               | Mouse             | Sigma (S4045)           | 1:1000                  | NA              |
| Cyclin D1                                                          | Mouse             | Cell Signalling (2926P) | N.A                     | 1:1000          |
| Cytokeratin WSS                                                    | Rabbit            | Dako (Z0622)            | 1:500                   | N.A             |
| Anti-mouse HRP                                                     | Goat              | Dako (P0447)            | N.A                     | 1:1000          |

| <b>Antibody</b>              | <b>Species raised in</b> | <b>Supplier (Cat No)</b>             | <b>Dilution for IF or IHC</b> | <b>Dilution for WB</b> |
|------------------------------|--------------------------|--------------------------------------|-------------------------------|------------------------|
| HSC70                        | Mouse                    | Santa Cruz (SC7298)                  | N.A.                          | 1:1000                 |
| $\alpha$ SMA                 | Rabbit                   | Abcam (ab5694)                       | 1:100                         | NA                     |
| Anti-mouse HRP               | Rabbit                   | Dako (P0260)                         | N.A                           | 1:1000                 |
| Anti-goat HRP                | Rabbit                   | Dako (P0160)                         | N.A                           | 1:1000                 |
| Fluorescein-goat-anti rabbit | Rabbit                   | Invitrogen (F27 65)                  | 1:100                         | N.A                    |
| Cy3 donkey anti-mouse        | Mouse                    | Jackson ImmunoResearch (715-166-151) | 1:100                         | N.A                    |

HSC70, heat shock cognate 70 kDa protein 8;  $\alpha$ SMA,  $\alpha$ -smooth muscle actin; Cytokeratin WSS, wide spectrum screening, recognising a broad spectrum of human cytokeratin; FGFR1, Fibroblast growth factor receptor 1; FGF2, Fibroblast growth factor 2; HRP, Horseradish peroxidase; c.s, coverslip; FFPE, formalin fixed paraffin embedded; IF, immunofluorescence; IHC, immunohistochemistry; WB, Western blot; N.A: not applicable.
