# Supplementary material for: Nuclear translocation of FGFR1 and FGF2 in pancreatic stellate cells facilitates pancreatic cancer cell invasion
Source: PubMed Central journal article supplement (PMC3992074; doi:10.1002/emmm.201302698), 2014-02-06
Supplement: emmm0006-0467-sd14.pdf [file emmm0006-0467-sd14.pdf]

**Supporting Information Table 3**

| <b>On Target plus SMARTPOOL siRNA FGFR1 L-003131</b> | <b>Target Sequence</b> |
|------------------------------------------------------|------------------------|
| J-003131-10                                          | GCCACACUCUGCACCGCUA    |
| J-003131-11                                          | CCACAGAAUUGGAGGCUAG    |
| J-003131-12                                          | CAA AUGCCCUUCCAGUGGG   |
| J-003131-13                                          | GAAAUUGCAUGCAGUGCCG    |
| <b>On Target plus SMARTPOOL siRNA FGF2 L-006695</b>  | <b>Target Sequence</b> |
| J-006695-05                                          | CUAAAUGUGUUACGGAUGA    |
| J-006695-06                                          | UCAAAGGAGUGUGUCUAA     |
| J-006695-07                                          | GCUAAGAGCUGAUUUUAAU    |
| J-006695-08                                          | GAUGGAAGAUUACUGGCUU    |
| <b>On Target plus SMARTPOOL siRNA FRS2</b>           | <b>Target Sequence</b> |
| J-060152-05                                          | GGUGGGAAGUGCUCGCUUA    |
| J-060152-06                                          | GAGAAGACCUGCACUAUUA    |
| J-060152-07                                          | UGAGAGAACUGCUGCUAUG    |
| J-060152-08                                          | GUACACCGACAGUCUUUAA    |
