# Supplementary material for: Nuclear translocation of FGFR1 and FGF2 in pancreatic stellate cells facilitates pancreatic cancer cell invasion
Source: PubMed Central journal article supplement (PMC3992074; doi:10.1002/emmm.201302698), 2014-02-06
Supplement: emmm0006-0467-sd17.pdf [file emmm0006-0467-sd17.pdf]

**Supporting Information Fig 3. FGFR1 and FGF2 expression in primary pancreatic stellate cells.**

A. Pancreatic stellate cells (PSCs) isolated from resected human cancer specimens (Methods) were characterised by expression of  $\alpha$ SMA, GFAP, desmin and vimentin markers (red).

B. Primary pancreatic stellate cells (PSC1, HPSC, FS1) as well as a pancreatic stellate cell line (RLT-PSC) demonstrated speckled nuclear localisation of FGFR1 (green arrow) as well as diffuse nuclear FGF2 (red, arrow).

Scale Bar: 20  $\mu$ m.
