# Supplementary material for: Nuclear translocation of FGFR1 and FGF2 in pancreatic stellate cells facilitates pancreatic cancer cell invasion
Source: PubMed Central journal article supplement (PMC3992074; doi:10.1002/emmm.201302698), 2014-02-06
Supplement: emmm0006-0467-sd20.pdf [file emmm0006-0467-sd20.pdf]

**Supporting Information Fig 6. FGF2-specific FGFR signalling mediated by FRS2 and MAPK/MEK/ERK pathway.**

A. Treatment of PS1 cells with FGF2 led to an increase in pERK and pFRS2 levels within 15 minutes. Activation of ERK and FRS2 was completely abolished following pre-treatment of PS1 cells with PD174074 inhibitor for 1 hour prior to FGF2 stimulation.

B-D. PS1 cells were treated with FRS2 RNAi and stained with antibodies to FGFR1 and FGF2. Knock down of FRS2 leads to a significant reduction in both nuclear FGFR1 and FGF2 (quantified in C and D, respectively) C, \*P=0.0112, \*\*P=0.0012. Students t-test. Data summary represented by mean  $\pm$  SEM.

E-F. Efficient knockdown of FRS2 after 72 hours was confirmed using Western blotting. Quantification of densitometry is shown in F.

E. G-H. PS1 cells were serum starved for 12 hours and subsequently stimulated with exogenous recombinant FGF2 (100 $\mu$ g/ml) for 2 hours. After 15 minutes of stimulation, there was a significant increase in both nuclear FGFR1 and FGF2 compared to serum starved cells. \*\*\*P<0.0001. Kruskal-Wallis test with Dunn's post-test comparison. Data summary represented by mean  $\pm$  SEM

Scale Bar: 20  $\mu$ m

Images are representative of at least three independent experiments
