# Supplementary material for: Nuclear translocation of FGFR1 and FGF2 in pancreatic stellate cells facilitates pancreatic cancer cell invasion
Source: PubMed Central journal article supplement (PMC3992074; doi:10.1002/emmm.201302698), 2014-02-06
Supplement: emmm0006-0467-sd21.pdf [file emmm0006-0467-sd21.pdf]

**Supporting information Fig 7. Nuclear FGFR1 and FGF2 correlate with Ki67 positivity in PSCs**

- A. Shows that all cells that were Ki67 positive (green) showed nuclear FGF2 (red).
- B. Similarly, all cells that were Ki67 positive (green) showed nuclear FGFR1
- C. Graphs show significant correlation between percentage of PS1 cells with nuclear FGF2 and Ki67 as well as percentage of PS1 cells with nuclear FGFR1 and Ki67.

Scale Bar: 20  $\mu$ m

Data summary represented by mean  $\pm$  SEM. Images are representative of at least three independent experiments
