# Supplementary material for: Nuclear translocation of FGFR1 and FGF2 in pancreatic stellate cells facilitates pancreatic cancer cell invasion
Source: PubMed Central journal article supplement (PMC3992074; doi:10.1002/emmm.201302698), 2014-02-06
Supplement: emmm0006-0467-sd25.pdf [file emmm0006-0467-sd25.pdf]

**Supporting Information Fig 10. Stellate cell proliferation upon conditioned media from cancer cells**

A Shows an increase in nuclear FGFR1 (green) and FGF2 (red) following culture of PS1 cells with conditioned media (serum-free) from COLO-357 cancer cells and complete media (10% FBS) compared to conditioned media from Dec hTERT normal epithelial cells or PS1 cells cultured in serum-free media (control).

B Quantification of percentage of PS1 cells with nuclear FGF2 shows that there was a significant increase in nuclear FGF2 following culture of PS1 cells with conditioned media from COLO-357 cells or complete media (10% FBS) compared to conditioned media from Dec hTERT normal epithelial cells (normalised to PS1 cells cultured in serum-free media). \*\*\* $P < 0.0001$ . Kruskal-Wallis test with Dunn's post-test comparison. Data summary represented by median  $\pm$  interquartile range

C Quantification of percentage of PS1 cells with nuclear FGFR1 shows that there was a significant increase in nuclear FGFR1 following culture of PS1 cells with conditioned media from COLO-357 cells or complete media (10% FBS) compared to conditioned media from Dec hTERT normal epithelial cells (normalised to PS1 cells cultured in serum-free media). \*\*\* $P < 0.0001$ . Kruskal-Wallis test with Dunn's post-test comparison. Data summary represented by median  $\pm$  interquartile range

Scale bar 20  $\mu\text{m}$ . Images are representative of at least three independent experiments.
